# Supplementary material
Source: publisher figshare collection journal article supplement (https://frontiersin.figshare.com/ndownloader/files/31320451)

Figure 1F

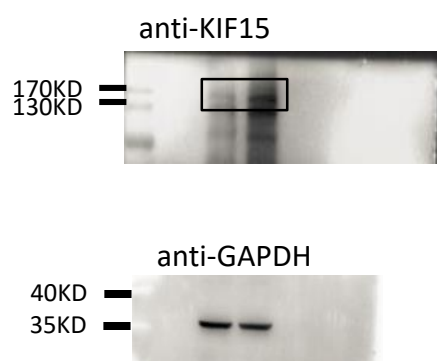

Figure 1H

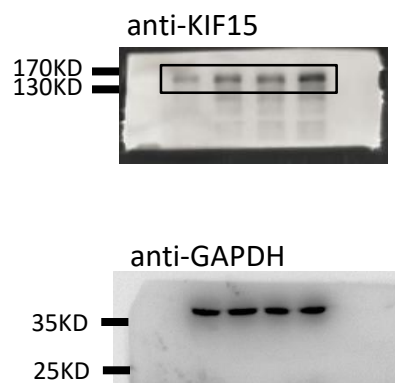

Figure 3G

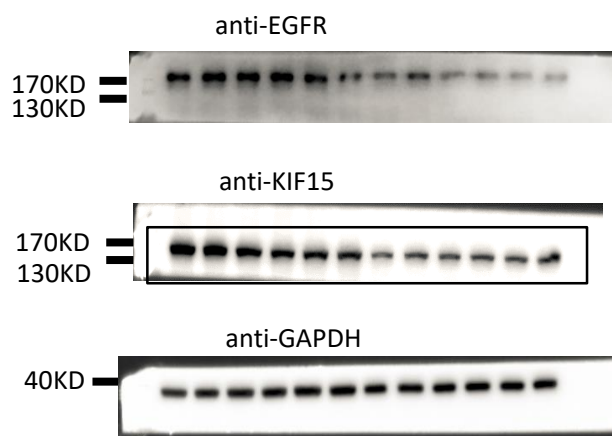

Figure 3H  
-LNCaP

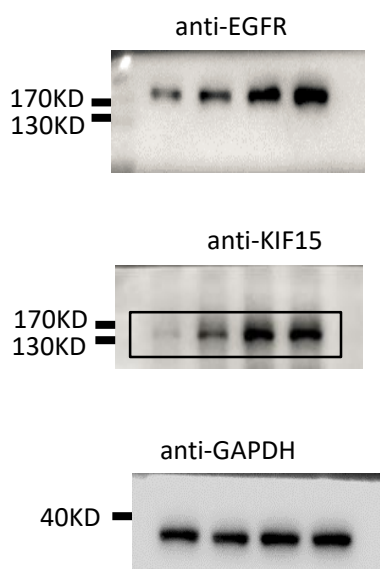

Figure 3H  
-C4-2B

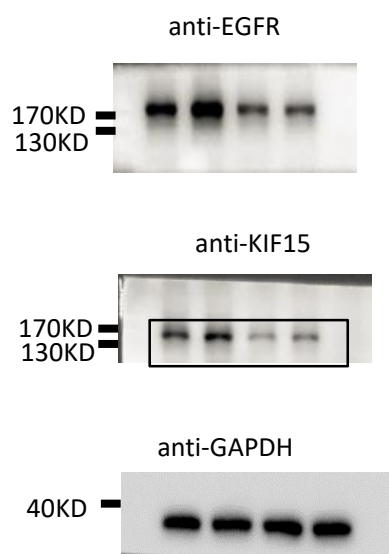

Figure 4A

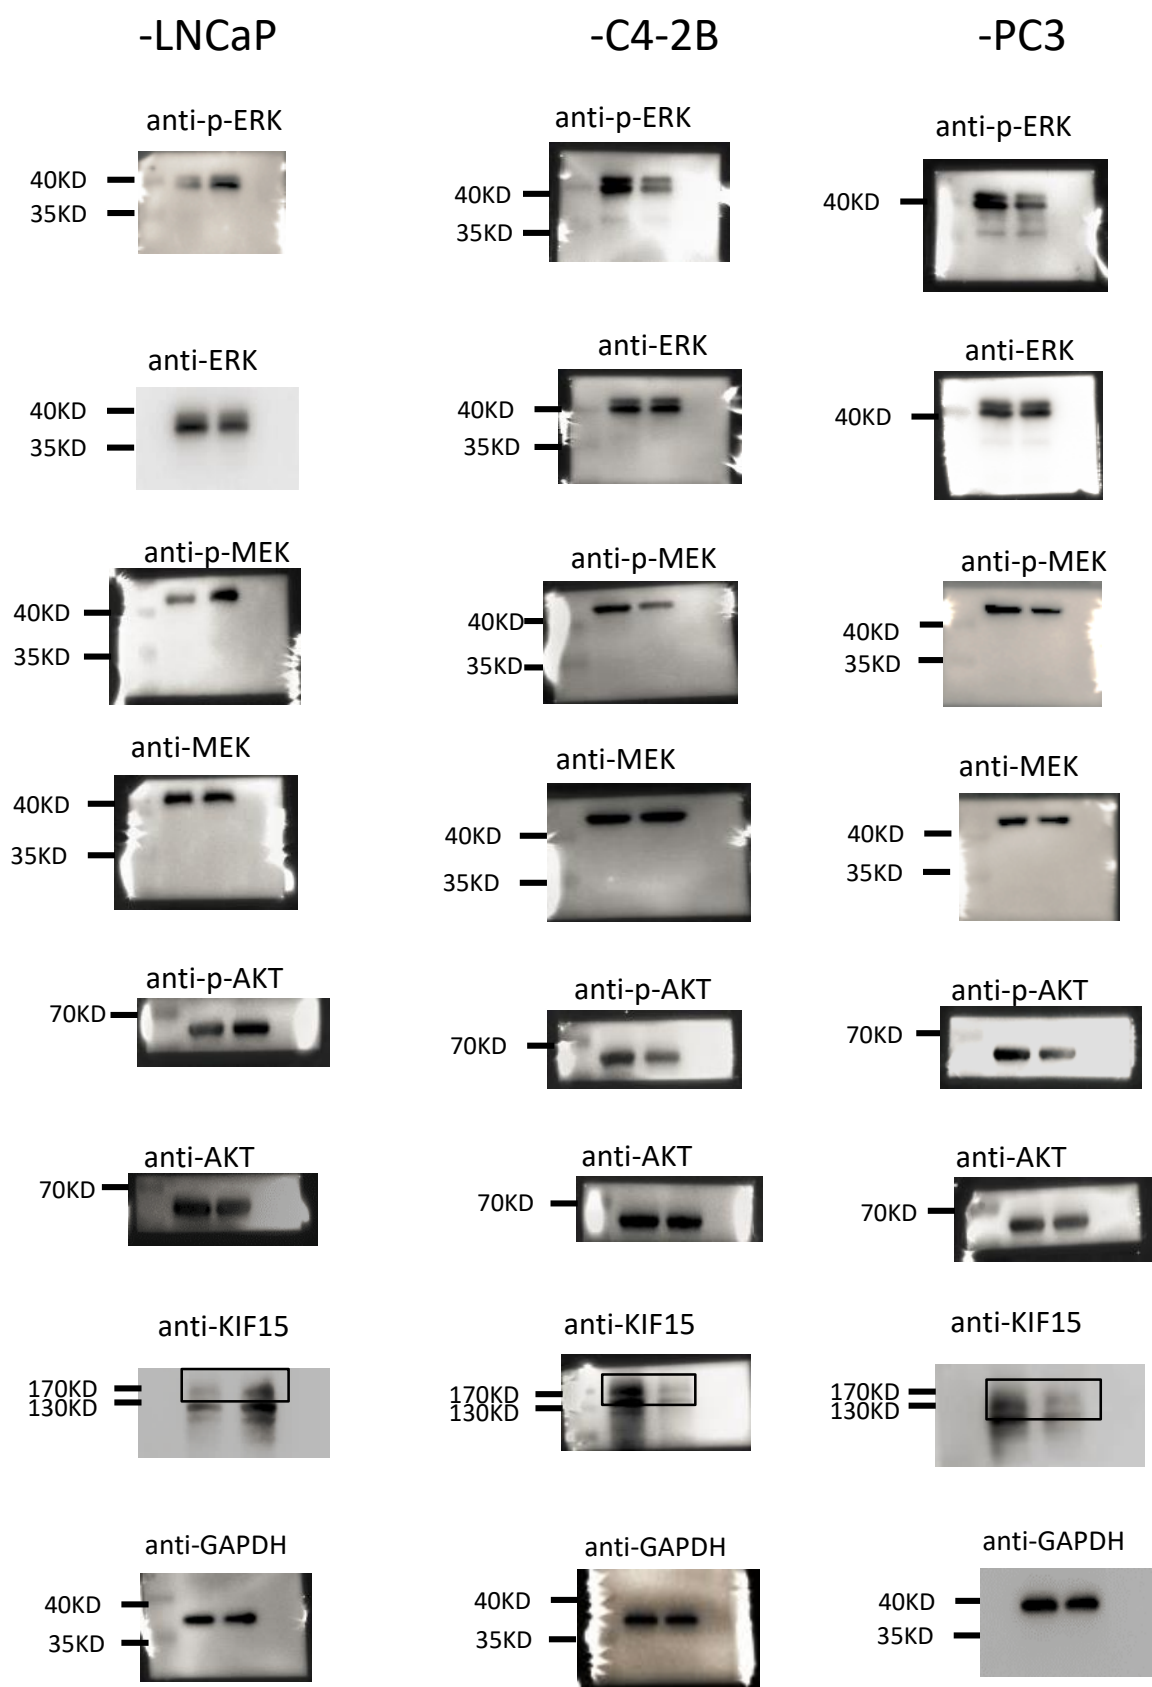

Supplementary Fig. S4. Unprocessed blot images for the western results in Fig. 4A.

Figure 4B

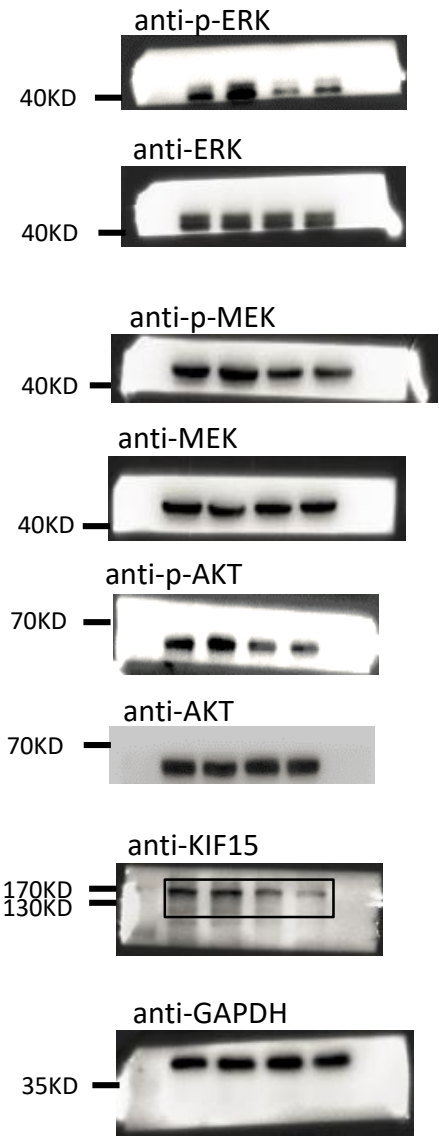

Figure 4C

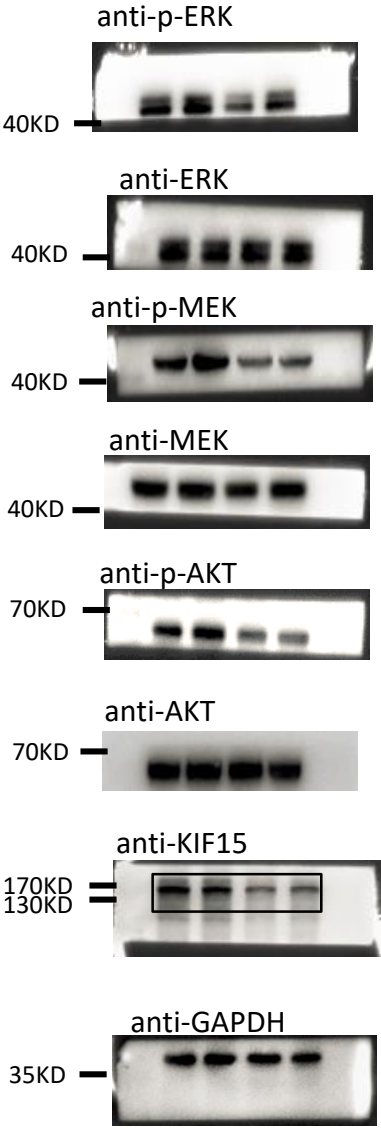

Supplementary Fig. S5. Unprocessed blot images for the western results in Fig. 4B-C.

Figure 4D

-LNCaP

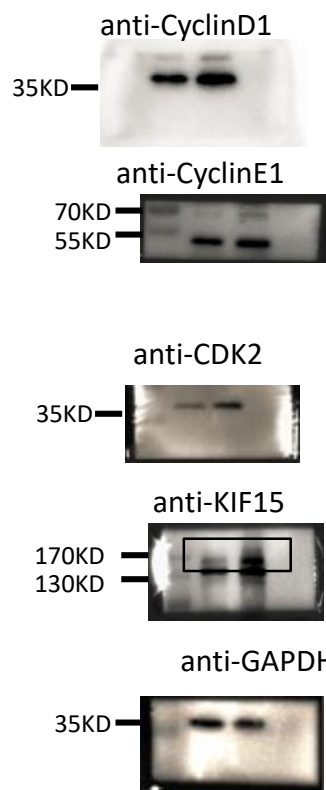

Figure 4D

-C4-2B

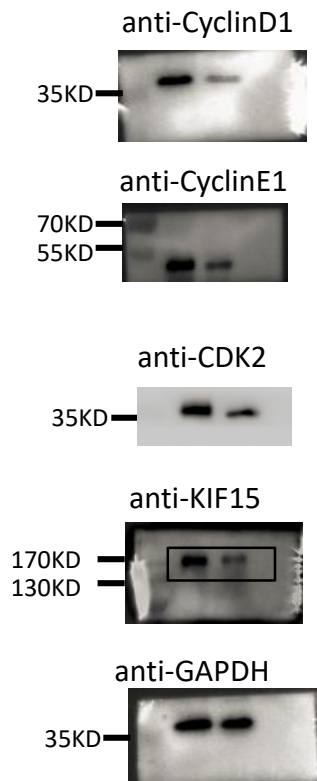

Figure 4D

-PC3

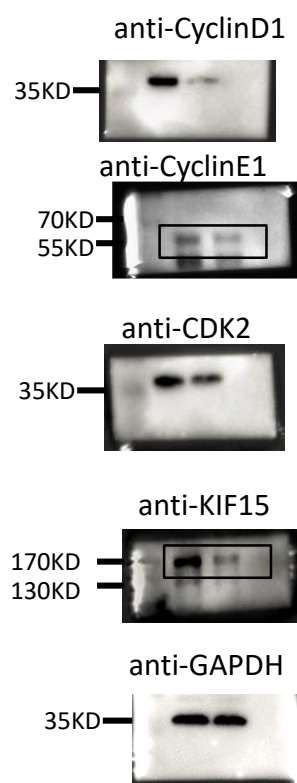

Figure 4E

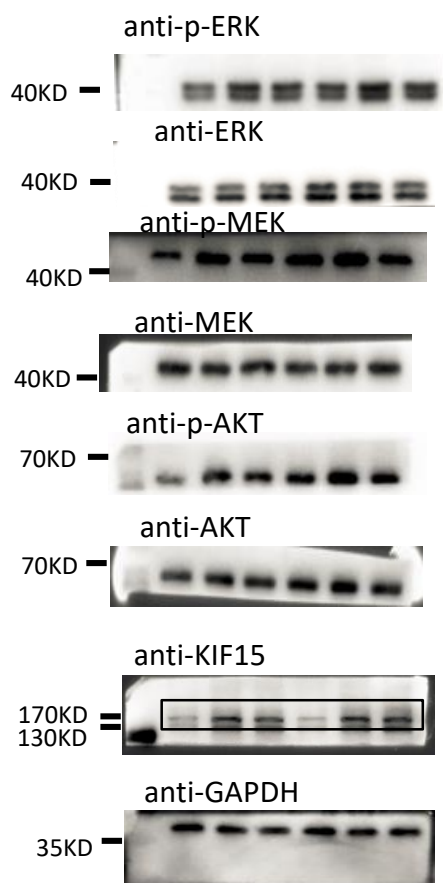

Figure 5A

-C4-2B

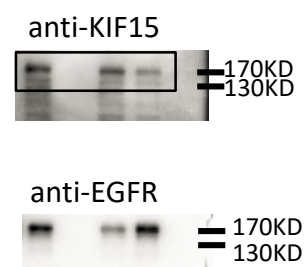

Figure 5A

-PC3

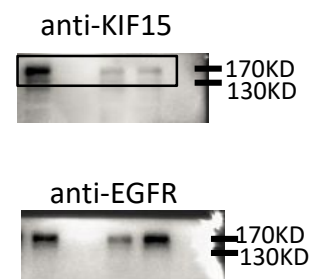

Figure 5B

-C4-2B

anti-EGFR

170KD

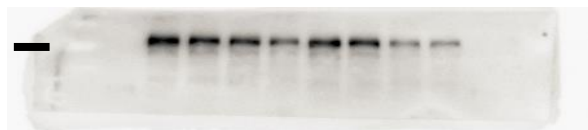

anti-GAPDH

35KD

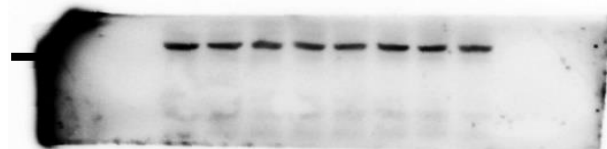

Figure 5B

-PC3

anti-EGFR

170KD

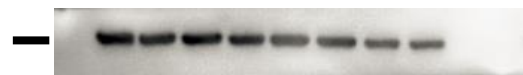

anti-GAPDH

35KD

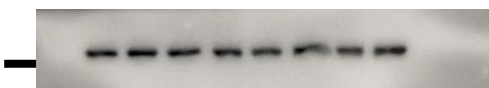

Figure 5B

-LNCaP

anti-EGFR

170KD  
150KD

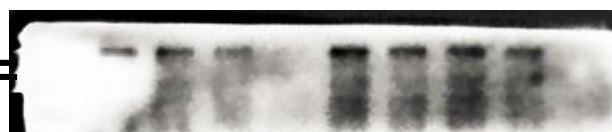

anti-GAPDH

35KD

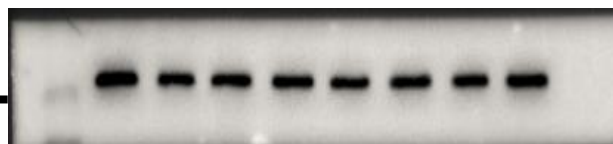

Figure 5C

-C4-2B

anti-CDC42 (Beads)

25KD

15KD

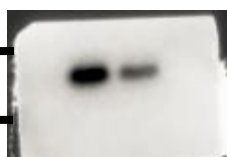

anti-CDC42

25KD

15KD

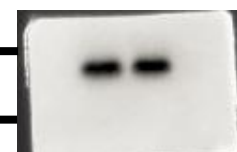

anti-KIF15

170KD  
130KD

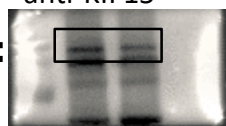

anti-GAPDH

40KD

35KD

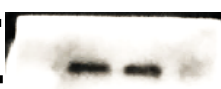

Figure 5C

-PC3

anti-CDC42 (Beads)

25KD

15KD

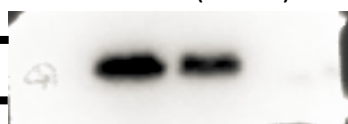

anti-CDC42

25KD

15KD

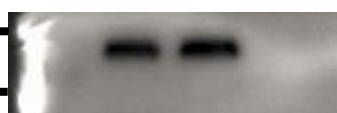

anti-KIF15

170KD  
150KD

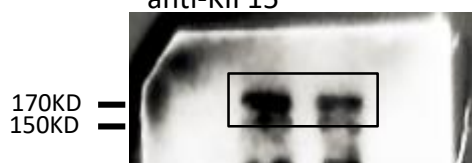

anti-GAPDH

35KD

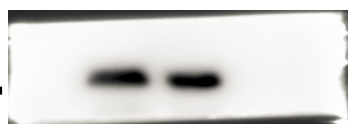

Figure 5D

anti-CDC42 (Beads)

25KD

15KD

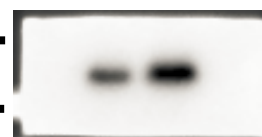

anti-CDC42

25KD

15KD

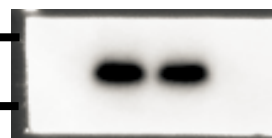

anti-KIF15

170KD  
130KD

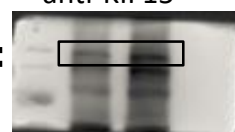

anti-GAPDH

40KD

35KD

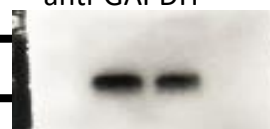

Figure 5E

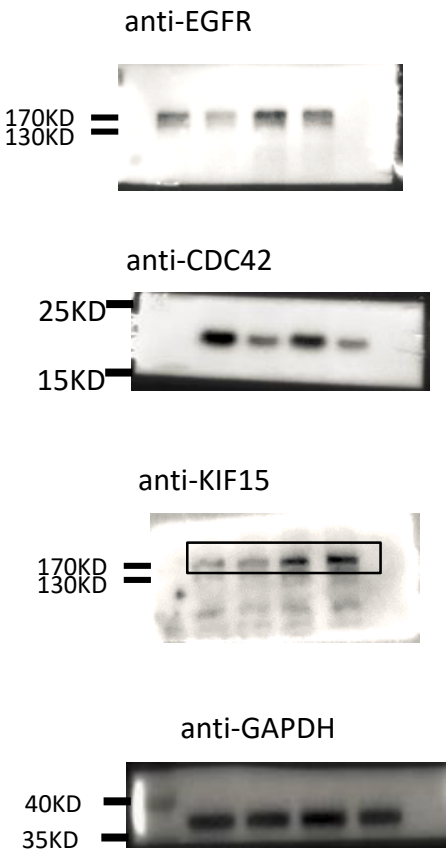

Figure 5F

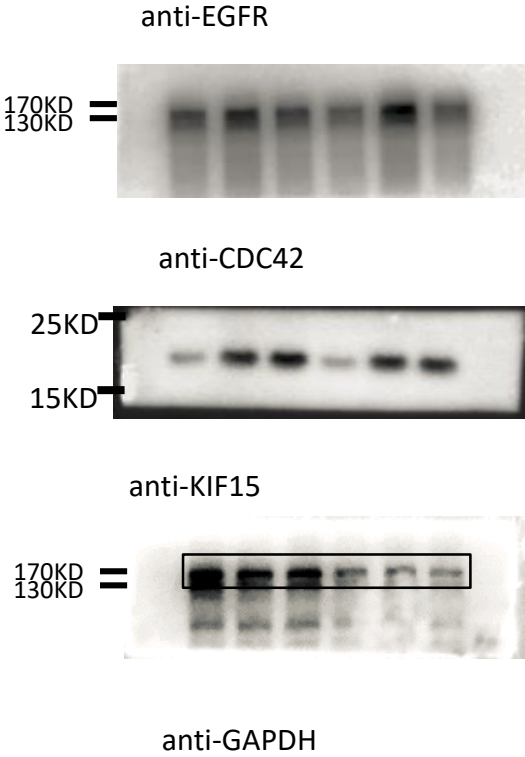

Figure 5G

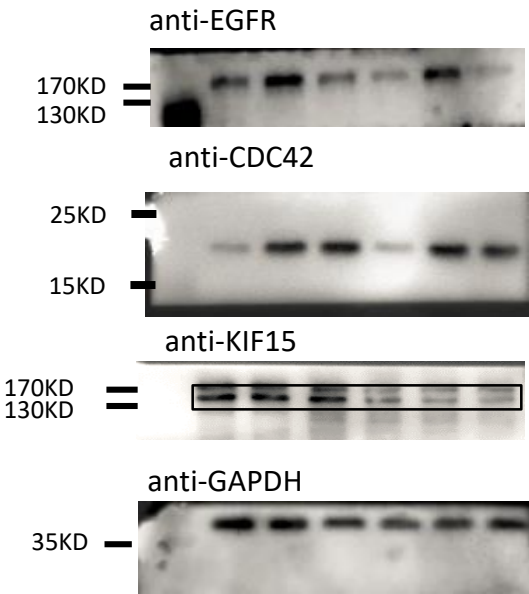

Supplementary Fig. S8. Unprocessed blot images for the western results in Fig. 5E-G.

Supplemental Figure 1A

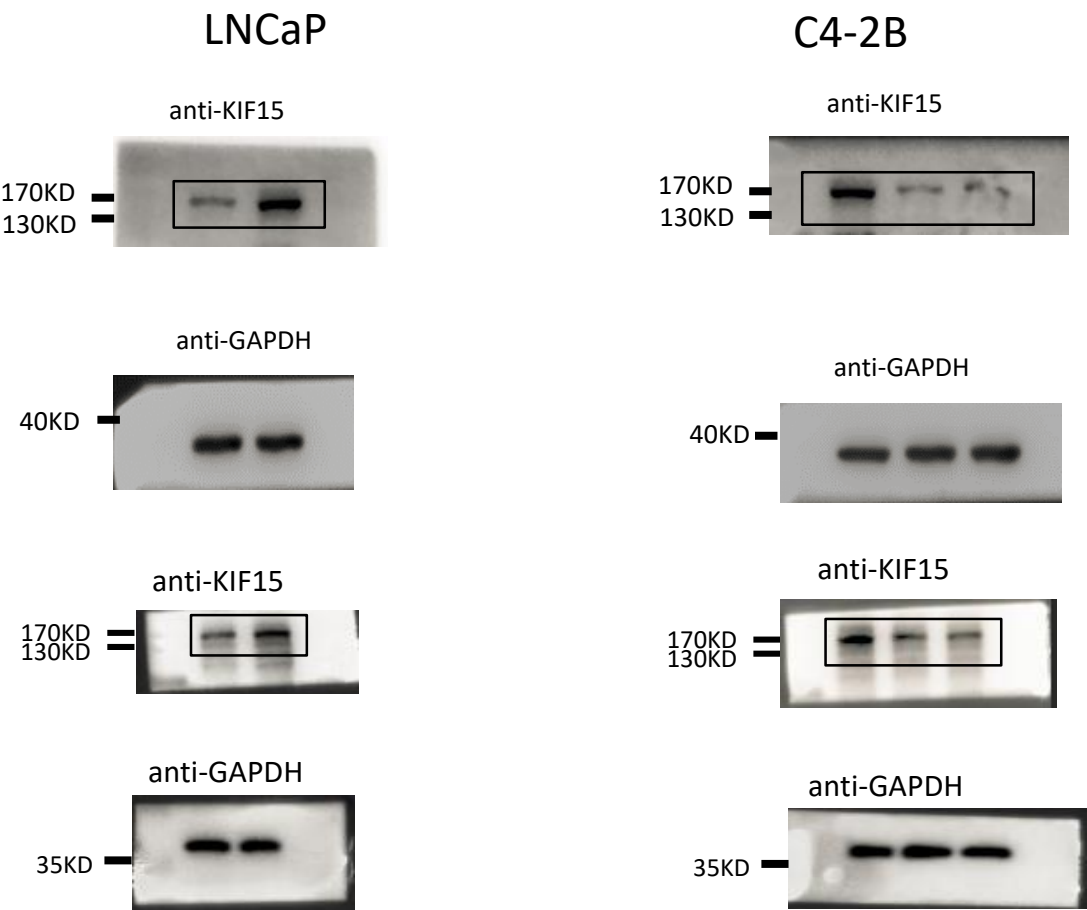

Supplemental  
Figure 2B

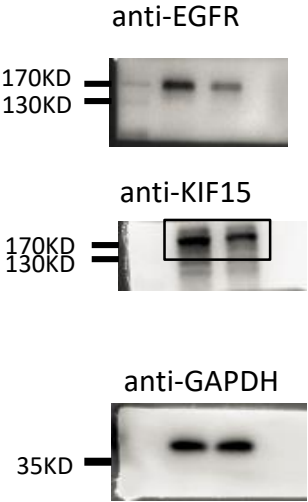

Supplemental  
Figure 2D

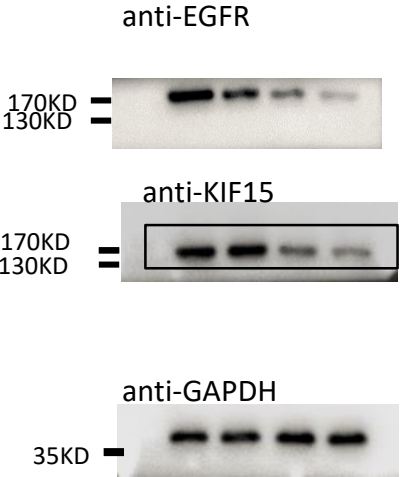

Supplemental  
Figure 2E

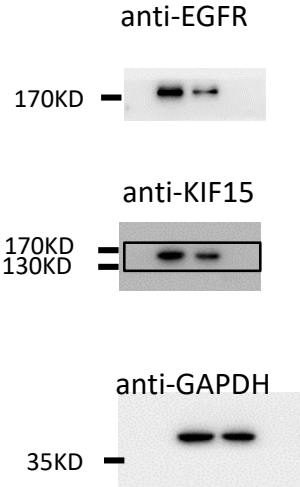

Supplement: Supplementary file [file 31320451]
